# Supplementary material for: Robust IgM responses following vaccination are associated with prevention of Mycobacterium tuberculosis infection in macaques
Source: Research Square preprint supplement (doi:10.21203/rs.3.rs-501008/v1), 2021-05-17
Supplement: Supplementary file 1 [file c5982c6f71bdf9e628b08f98.xlsx]

## Sheet: READ_ME
Supplementary Data
	Data associated with Irvine et al. "Robust IgM Responses following vaccination are associated with prevention of tuberculosis in macaques"
	Sheet	Description
	Raw_BCG_Route	Raw Systems Serology data from BCG Route study
	FC_Z_BCG_Route	Z-score of fold change of Systems Serology data from BCG Route study
	Raw_SigH	Raw Systems Serology data from Mtb-ΔsigH study
	FC_Z_SigH	Z-score of fold change of Systems Serology data from Mtb-ΔsigH study
	Metadata from BCG Route Study:
	> Animal ID
	> Group
	> Timepoint
	> Lung Mtb burden data from original IV BCG manuscript (Darrah et al. Prevention of tuberculosis in macaques after intraveous BCG immunization Nature 2020)
	Metadata from Mtb-ΔsigH Study:
	> Animal ID
	> Group
	> Timepoint

## Sheet: Raw_BCG_Route
ID	Group	Mtb.burden	BAL.Pre.ADCP.LAM	BAL.Pre.ADCP.PPD	BAL.Pre.ADNP.LAM	BAL.Pre.LAM.CD107a	BAL.Pre.LAM.IFNg	BAL.Pre.LAM.MIP1b	BAL.Pre.HspX.IgG1	BAL.Pre.PPD.IgG1	BAL.Pre.LAM.IgG1	BAL.Pre.PstS1.IgG1	BAL.Pre.Apa.IgG1	BAL.Pre.HspX.IgM	BAL.Pre.PPD.IgM	BAL.Pre.LAM.IgM	BAL.Pre.PstS1.IgM	BAL.Pre.Apa.IgM	BAL.Pre.HspX.IgA	BAL.Pre.PPD.IgA	BAL.Pre.LAM.IgA	BAL.Pre.PstS1.IgA	BAL.Pre.Apa.IgA	BAL.Wk4.ADCP.LAM	BAL.Wk4.ADCP.PPD	BAL.Wk4.ADNP.LAM	BAL.Wk4.LAM.CD107a	BAL.Wk4.LAM.IFNg	BAL.Wk4.LAM.MIP1b	BAL.Wk4.HspX.IgG1	BAL.Wk4.PPD.IgG1	BAL.Wk4.LAM.IgG1	BAL.Wk4.PstS1.IgG1	BAL.Wk4.Apa.IgG1	BAL.Wk4.HspX.IgM	BAL.Wk4.PPD.IgM	BAL.Wk4.LAM.IgM	BAL.Wk4.PstS1.IgM	BAL.Wk4.Apa.IgM	BAL.Wk4.HspX.IgA	BAL.Wk4.PPD.IgA	BAL.Wk4.LAM.IgA	BAL.Wk4.PstS1.IgA	BAL.Wk4.Apa.IgA	BAL.Wk16.ADCP.LAM	BAL.Wk16.ADCP.PPD	BAL.Wk16.ADNP.LAM	BAL.Wk16.LAM.CD107a	BAL.Wk16.LAM.IFNg
05G	Hi-ID	50	96.2554	33.9076	40.9632	0.94	0.915	22.9	87.5	128.75	177	95	103	72.5	155	224.25	112.5	107.5	81	108	179.25	89.5	94.5	105.503	37.0117	43.5804	1.13	0.89	20.5	77.5	119.25	236.75	98.5	100	85.75	130.5	190	103.5	100.5	72.25	111	190.75	88.25	90.75	133.733	38.0576	44.3044	1.93	1.03
077	ID/AE	22800	69.7253	39.739	36.905	0.88	1.295	20	82.5	118.25	170	94.25	94	89.75	142.75	227.75	111	114	91	125.5	186.25	98	107.5	93.6046	32.0521	52.0726	1.075	2.255	23.7	88	125.25	188.5	94.75	101	114	175.75	486.25	202.75	148.5	79	119	184.25	105	97	83.7974	33.4307	40.762	0.97	1.05
07C	IV	0	131.105	42.9044	48.9192	0.93	1.17	20.9	84.25	139.5	177.25	84.5	92.75	87	130	190.5	91	107.25	83.75	123.5	179.75	98.25	103.5	157.952	47.5793	85.2116	2.165	1.445	19.8	78.5	160.75	12855.2	272.25	234.25	107.75	180	847	264.5	147	92.25	141.75	1742.25	204	146.25	117.519	38.2975	58.4906	0.875	1.385
07E	Lo-ID	9.64562e+06	88.5436	37.5678	38.6644	0.875	2.295	20.45	73.5	128.75	172.25	87	100.5	92.25	128	199.25	102.5	111.5	76.25	131.5	174	101	90.25	95.5284	43.3111	43.0328	1.415	1.86	23.05	80.75	120.5	177.5	84.5	96.5	74.5	130	185	98.5	106.5	72.25	115.25	178.5	84	90.75	93.6248	37.7734	39.3105	1.005	1.65
0BD	AE	90895.5	111.992	35.7879	52.0156	1.3	1.485	21.55	79	127.5	183.75	100	99	84.75	132.75	200	92	102.5	76	123.75	190.5	94.25	94.5	85.9815	30.9876	48.3619	1.315	2.635	23.25	74	119	181.5	92.5	96.25	71.5	125.25	181.5	90.5	98.5	77	121.5	188.5	88	94	123.872	37.1188	51.7161	1.055	1.415
0E1	IV	0	66.9214	41.3955	44.0568	1.195	1.73	20.8	80	134.25	183	89	103.25	90.5	139	224	134.5	133.25	80.75	120	177	117.25	535	146.706	52.4714	119.935	5.15	2.4	34.9	88.25	189	14722	360.75	183.5	215.5	561.25	8897.5	1868.5	661.5	109	213.75	2156.5	443.5	872.5	121.329	37.8656	60.3811	2.11	1.73
0EN	ID/AE	501479	151.048	35.537	58.9892	0.77	2.34	14.7	98.5	134.5	176	94.5	106	78.25	131.5	184	102	103.5	84.75	142	181	110.5	109.5	136.438	33.3614	46.6072	0.93	2.615	18.45	87	130.5	201	98.5	104	81.25	133.25	220	117.5	100.25	80	113.75	197	96	104.25	94.2044	32.7972	53.8212	0.96	4.28
0MI	Hi-ID	67930	91.2336	35.4366	37.5851	2.17	2.49	37.95	93.5	135	199	94.5	107	79	135.5	199.75	110.5	111.75	81.25	129.25	182.5	118.25	102	60.7429	34.5807	24.6871	1.255	1.865	33.3	75	123.5	466.25	86.75	95.75	98.75	150.25	223.5	130.5	114.5	76.5	128.75	234.75	484	197.5	99.7337	38.5339	41.1373	1.205	3.345
0NF	ID/AE	397671	102.366	35.0381	34.4297	1.34	1.66	28.15	85	115.75	171	92.25	95	107	143.75	240	120	120.5	83.75	117.25	176	102	94.5	103.548	34.6032	37.3574	1.355	1.85	29.55	83.5	128	1593	98	99.5	95	158	286	156.75	115	68	126.5	372.5	99	94.75	112.715	39.6639	39.9836	1.82	1.66
0NR	IV	30	87.1387	42.8338	51.6507	1.03	0.935	26	97.25	125.5	188.25	104.25	108	87.75	140.75	247.25	135.75	113.5	95.5	144	183	118.75	108.5	132.218	61.0155	54.0951	4.995	1.275	27.8	112	218.25	6423	255	262.25	359.75	675.25	22068.5	5464	1092.25	148	244.75	2695.5	460.5	224.5	121.9	41.0607	50.5731	1.665	0.79
0TL	Hi-ID	2120	103.793	29.6798	44.2831	1.885	2.98	36.85	74	113	263.5	86	91.75	91.75	125.25	203	99.25	106	75	119.25	229.5	87.5	92	128.413	34.0266	52.0598	2.745	2.72	36.5	85.25	142.25	1260	125	109.5	91.5	144.5	195.5	99.5	97	72.75	120.75	386.5	103	97.25	151.833	39.4296	48.7562	1.455	1.84
0TM	Lo-ID	29030	55.2881	42.2776	34.9866	1.215	1.105	27.05	93.75	121.5	172.5	97.75	106.25	82.5	133.25	187.75	103.25	101.75	83.5	122.25	174	104.75	102.25	127.795	46.1274	60.0727	1.325	1.365	28.3	109	166.25	189.75	147	107.75	108.75	168	279.5	185.5	167.25	139.75	169.5	190.75	264.5	184.25	94.6392	39.1545	43.883	1.255	1.475
CZRJR	AE	765932	68.421	32.6891	34.8886	1.205	1.035	23.15	78.5	114.25	165	80.25	99	89	145.25	198.5	121.25	135.25	79.75	124	180	105	119.75	158.798	36.2005	47.956	1.24	0.94	19.45	77.5	121.25	179.25	91.75	89.5	101	154.75	546.5	229.5	161.75	87	130.75	208.25	122.5	126.5	143.077	36.3879	49.0004	1.055	1.035
DF2A	IV	0	142.199	45.131	39.6751	0.835	0.85	15.35	86	122.25	176.75	95.5	99.25	99	119.5	187	90.75	103.5	79	139.75	185.25	91.75	107	194.028	58.2445	156.201	16.45	6.47	27.8	274.25	2930	52104.5	3725.75	1808.25	666.5	1516.75	32278	13565.2	1691.25	194.5	1026.75	4205.75	1102.25	998.5	130.422	38.0567	51.8795	3.635	1.215
DF3A	IV	0	103.735	41.9684	46.7386	2	1.645	24.05	81	119	173.75	95	93.5	89.5	135.25	175.25	116.25	111.5	78	128.5	180	91.5	93.5	167.52	62.6271	108.16	8.67	2.415	29.5	105.25	259.25	17823	797.5	264.5	237.5	940.75	43034	8386	1503.75	98.5	194	1411	358	150	141.661	52.7807	50.7727	1.81	1.54
DF4X	ID/AE	110	70.0924	35.3416	42.8241	0.65	14.885	21.5	75.75	122	172.75	89	95.5	81.5	127	171.5	96.25	96.5	91.5	145.5	192	127.5	114.25	119.699	34.1828	48.8713	0.93	8.495	13.52	80.75	119.5	187	85	96	82.75	128.75	171.75	96.5	95.5	75.25	127.5	189	93.5	94.5	76.5258	25.4201	43.623	0.995	4.635
DF5T	Lo-ID	160711	118.198	41.7095	34.2871	1.3	2.1	17.8	82	127	172.5	100.25	100	83.75	136.5	193.25	93.5	109.75	79.75	123.5	181.75	106.75	121	106.418	38.307	38.436	0.875	1.18	17	78.75	123.5	179.5	92.25	96.5	79.5	137.25	198.5	131.5	125.25	83	113.5	175.5	123	159.5	95.722	47.828	43.5414	1.37	1.95
DF7X	Lo-ID	860350	102.232	40.5097	54.0273	1.68	1.445	27.7	80.5	115.25	167.5	89.75	95.75	76.25	119	182.5	93.75	101	85.25	123.75	160	99.75	106.5	158.958	30.0488	42.5982	1.155	1.145	32.95	81	124.25	160.5	89.5	96.25	91.5	146.75	184.25	89.75	109	78.5	125	165.25	84.75	93.75	119.902	43.1443	53.4554	1.365	1.105
DF8J	Hi-ID	39765	100.025	35.5676	30.0261	0.96	0.815	18.8	78.25	128	228.5	98	101	103.5	140.5	225.25	101.25	111.75	85.5	129.5	200	102	121	64.2986	41.0571	26.8029	0.95	0.755	19.6	80.5	114.5	768	100.75	87.5	93	142	212.25	111.25	106.5	65.5	134.25	254.5	98.75	102.5	91.4189	45.044	27.489	1.065	0.945
DF9F	Hi-ID	42860	87.6213	34.4175	27.0567	1.415	1.545	25.55	80	121.25	177	91	90.5	92.5	129.75	207.5	103.25	120.75	78.5	128	184.5	104.5	96.5	86.6338	35.4498	24.8702	1.115	1.16	22.5	81	115	810	96.25	99.25	83.5	142	220	109.25	118.25	80.5	122	265.5	109	118.5	101.964	43.4798	50.2038	0.855	1.095
DF9I	Lo-ID	700608	83.6281	31.8145	46.4462	1.115	1.17	23.75	81	122.25	172	93	96.75	93.75	137	202.75	95	112	74.75	116.75	187.75	91.75	93.25	101.147	30.6693	39.7387	1.135	0.97	24.85	74.5	130.5	170.25	89.25	94	90.75	147.75	205	103	102.75	81	119.25	176.5	90.5	97	143.21	38.3448	50.919	1.125	1.435
DFB3	AE	71910	84.0345	34.0862	44.9564	1.57	1.095	20.2	75.25	129.75	190.5	91.75	95.5	88.25	137.25	195	135.5	114.5	68	126.5	175.25	146.75	227.5	69.0168	34.7302	34.2779	0.905	1.085	17.45	80.5	131.75	212.75	93.5	96.5	90.25	131.25	223.5	130.5	120.25	79.5	112	189.5	157.5	247	113.591	39.3198	42.9679	1.185	0.875
DFG1	IV	1549460	95.2298	45.3556	33.6487	1.015	1.38	28.9	67.25	118.25	192.25	86.5	94.75	94	138.5	211.25	104.5	102	77.5	141.25	200.5	106.75	98.75	172.766	67.4369	52.1964	12.155	2.85	39.1	83.5	335.5	34926.5	552.25	555	196.5	384.75	3326.75	690.5	277	116	347	4247.75	515	249.25	112.23	38.1444	38.5938	1.3	1.32
DFH1	AE	22125	99.975	37.2752	53.1488	0.945	1.39	20.45	89.75	118.75	174.25	97.25	102.75	89.25	150.5	224	118	118.25	81.25	131.25	193	110	110.5	128.854	43.5594	47.035	1.04	1.225	22.15	84	127	167	99.5	102.5	113.75	188.25	304.5	147	117.5	93.75	146.5	203.5	121.5	119.25	121.118	40.1454	47.8788	1.1	1.73
DFI0	AE	61548.7	60.6939	33.7236	42.528	1.485	1.96	21.75	88.5	131.75	171.25	99	102.5	89.25	141.75	207.5	118	111.75	102	190	174.75	155	118.75	126.796	48.7655	53.0405	1.47	1.945	22.85	90.5	134.5	173	93.5	97.5	94	159.25	289	160.25	127.5	97.5	167.25	198	142.5	110.5	98.8943	27.4947	51.9744	2.59	1.47
DFJ3	AE	74120	132.727	41.7057	44.6487	0.875	0.86	20.95	82.5	124.25	170	90.5	92.25	81	155.25	201	112	110.25	80.25	117	174	89.5	94.25	151.564	37.0494	42.3103	1.475	0.93	21.3	87.5	115.75	175.5	92.25	95.25	100	147.5	315	122.5	124.75	76	128.75	173.5	100	89.5	153.373	45.6334	37.5436	0.98	1.005
DFL6	ID/AE	3057750	104.362	28.8922	44.4375	1.15	1.345	29.05	78.5	104.75	166	84.25	88	101.75	166.25	326.5	147.5	126.75	76.5	117.5	174	93.5	93.25	121.362	32.9814	49.3928	1.09	1.515	27.65	77.5	128.75	172.25	88.5	95.25	94	139	271	151.25	114.5	70.75	109.5	182	93.5	98.25	153.599	39.8249	49.5627	1.69	1.75
DFTA	IV	0	80.6322	46.6152	29.3255	1.18	0.91	26.65	76.5	124.5	179.5	90	97.5	107	148	231	127.5	115.75	70	129	194	104.25	126.25	122.229	60.4197	91.7203	3.39	1.45	20.4	162	2895.25	11899.8	2282	1713.5	619	2255.5	37051.8	14976	2656.5	263.25	1510.5	9778.75	2204.75	1059.75	113.122	44.1309	76.5449	1.2	0.87
DFVJ	Lo-ID	19330	136.579	30.332	50.0177	1.185	2.495	24.8	82.5	117.5	179	96.75	93.5	89.5	118	177.25	100.5	93.5	89	124	181	106.75	94.5	119.821	35.0889	38.7414	1.215	2.32	27.85	91	121.75	175.25	107.75	96	85.25	127.5	169.25	95.5	100	88.5	141.5	184.25	99	104.5	68.3489	38.0839	46.1527	1.355	2.6
DFW0	AE	54215	82.6911	52.0348	48.0354	1.375	1.43	18.1	80.5	117.75	177.5	91.75	96.25	76.25	122.25	177.25	95	97.5	71.25	124.75	185.25	92.5	94.25	104.167	42.3186	40.0065	0.955	1.48	18.55	83.25	119.25	179.5	89	94	84	126.75	192.5	94.5	106.5	68	129.5	179	88.5	87.5	125.817	39.5627	46.7869	1.425	1.555
DFWG	ID/AE	1.12327e+06	115.138	34.6651	22.3228	1.195	1.05	26.9	85	116	210.75	94	100.5	89	128	199.25	123.5	106.25	76.75	124.5	184.25	94.5	95	135.952	42.3292	53.0516	1.37	0.95	25.05	100	139	3990	186	129.25	94.5	141.75	263	143	113.5	93.75	142	564.5	158.75	112.5	221.71	39.8799	61.2277	1.49	1.235
DFX2	Lo-ID	169720	138.505	36.1104	77.4938	0.7	2.46	19.2	91.5	123.5	177.75	104	111.25	76.5	121.25	172	93.5	103	81.5	140	179.5	106	95.25	126.83	45.6825	64.6927	1.795	3.34	25.05	84.75	119.25	170	91.5	102.5	88.25	148.25	171.5	95.25	92.5	77	130	176	91	101	132.715	42.1012	52.0509	1.155	2.03
DFX6	AE	697082	134.357	48.4263	46.1116	0.955	1.81	22.9	77	121.25	170.25	88.5	92.5	90.5	124.75	185.5	95.25	97.25	81	116	171.5	96.5	98.5	97.5045	36.2341	45.6768	1.61	2.055	20.5	81	121.5	172.75	96.5	97.5	98.75	137.5	210.5	107.5	109.75	88.25	131.25	185	98	111.5	151.661	64.6303	42.704	1.685	2.09
DFXH	ID/AE	86330	109.202	37.6715	45.97	0.77	1.18	17.75	83.75	125.25	183.5	86	94.75	82.5	125.75	182.5	100.75	105	88	138.5	182	96.25	93	65.0597	34.271	32.5017	0.985	1.49	18.25	78.5	107.75	169.25	92.75	86.5	82	136.25	191.5	91	103.5	84.75	135.75	186.5	100.5	98	99.8238	31.7033	45.2843	1.075	1.485
DFXL	Lo-ID	37530	111.05	43.7028	39.0045	0.68	2.45	18.05	75.25	121.25	171.25	89	106.25	78.75	134	177.25	92	96.5	75	108.25	176.25	88.25	94.5	105.802	39.2975	38.8028	1.06	2.035	20.15	78.75	118	161.5	88.5	90	87	128	179.5	87.25	101.5	74.5	124.75	173.5	91.75	96.75	91.6864	36.7127	42.1103	0.72	1.875
DFZ4	Lo-ID	116495	87.0807	35.0507	45.2079	1.055	1.065	26.4	85.25	133	374	87.5	103	89.5	114.25	181	89	141.25	76	119.25	219.25	99	220	115.622	28.9475	50.0975	1.04	0.945	27.65	84.5	129.25	726	86	110	90.5	136.75	206	103.5	159.5	77.75	133.5	269	106.5	186.25	181.942	37.7802	43.8911	1.495	1.045
DG02	Hi-ID	60880	126.324	39.3404	40.9508	0.925	0.81	19	83.75	121	171.5	93.25	96	79.75	144	190.75	95.75	103.75	79.5	122.75	186.25	94	94	89.6895	43.6613	43.8368	1.52	1.285	19.4	97.75	132.75	193.25	97.5	104.75	72.5	153.5	214	115.25	104.25	88	130.25	197.5	121	105.75	136.923	47.422	50.4196	1.195	1.08
DG05	ID/AE	310350	81.0192	42.3641	27.3441	0.995	1.725	21.65	84.75	132.25	173	103	103	84.5	139.5	170.5	94.75	111.75	75.5	124.75	173.25	87	101.25	159.975	34.7039	41.6725	1.07	1.27	18.6	86.5	138.75	178.5	109.25	108.25	94	137.5	202	105.75	98.5	92.75	138.25	174.25	126.25	107.75	90.9395	35.7553	44.7755	3.905	2.275
DG49	Hi-ID	185198	85.4682	28.5705	36.1996	1.12	1.06	19.75	92.5	134	170.25	102	105.25	95.5	141	199.25	109	103.5	83	125.25	170.5	94.75	100.5	117.508	42.9457	47.3199	1.885	1.2	24.05	96.75	136	185	105.5	105	99.25	142.5	216.75	104	121.25	92	146.25	181.75	115	117.75	112.395	38.4978	56.9992	1.19	1.725
DG75	IV	0	160.448	38.7118	40.4296	1.305	1.84	33.15	80.25	132	170.25	87.5	96	94.75	137.25	238	110.5	107	78.25	111.5	173.5	91.5	100	139.195	70.3239	62.5319	12	2.435	32.15	94.5	173.25	28247.5	322	208	834.75	1737.25	16701.2	3055	1253.75	207	402.25	3338.25	473	256	202.537	53.0213	49.3617	3.88	1.375
DG82	ID/AE	11395	97.5596	29.9261	37.9987	1.01	1.235	32.35	76.5	123	166.5	102.5	100.75	84.5	143.25	184.75	102	101	84.25	134.75	162	102	97.75	162.581	42.9045	40.3244	1.28	1.565	25.65	82.5	135.75	381.75	115.75	114.5	99.75	145.5	312.25	156.25	126.75	75	130.75	241	98.5	97.5	177.267	46.7592	42.259	1.33	1.105
DJF9	IV	45	131.762	45.1429	44.916	1.415	2.06	21.3	87.75	130	176.5	112	96	87.5	135.75	204.5	103.5	103.5	104	139.5	191	183.25	143.25	157.772	56.7421	102.898	19.55	4.215	40.05	179.25	811.25	31424.2	3023.25	1061.5	311.5	1149.5	27272	11207.2	1509.5	296.25	697	5683.25	3329	888.75	108.604	49.4482	42.9025	1.53	2.065
HBN	ID/AE	315270	64.8934	39.8083	32.949	1.135	1.1	18.05	88	148.25	171.5	104	102	90.25	148.5	214.25	104.5	112.25	79.25	124.75	172.25	93.75	96	123.939	44.9473	30.4495	1.03	0.835	18.2	87.75	118	219.75	96.25	99	110.75	176	315	157	131	85.5	134.25	211.75	101	106.25	79.0902	47.9399	32.8508	1.215	0.92
HCA	AE	187339	143.598	36.9279	57.2901	1.15	1.395	24.7	88	124.75	167.5	98.25	96	107	172.25	239.5	114.5	125.5	87.5	130.75	172.75	85.5	97	115.229	45.6992	46.8384	1.035	1.075	23.45	91.5	118.75	172.75	106.5	102.25	80.5	156.5	275.5	118.25	122	81	124	195.5	105	110.5	129.374	38.5465	42.4218	0.935	1.075
HCE	Hi-ID	29595	169.828	37.8018	44.653	1.24	1.1	18.95	82.5	100.5	168	95	96.25	78.5	129.25	174.5	94	95	75.75	108	179.25	89.5	102.5	125.513	39.7649	41.1635	1.37	1.16	21.5	82.5	121.5	173.25	101.75	98.5	75	114.25	184.5	95.5	101.25	86	120.75	172	92.75	102.75	101.635	30.0959		1.44	2.59
HCL	IV	45	97.1391	37.9699	52.9676	0.985	0.935	25.8	86.25	120.5	174.5	92	111.5	96.75	142	204.5	106	110	74.75	128.75	182.25	91.25	102.25	167.646	47.0373	121.765	6.945	1.84	27.35	105.5	235	16251.8	619.25	274.5	456	1091.5	18247.5	15641	1170.5	106	196.5	3569.5	755	184.75	131.929	34.051	47.2747	1.045	0.865
O96	Lo-ID	58960	162.398	57.7036	45.076	1.17	1.41	26.45	109.5	165.25	182.5	131.75	118.25	77.5	138.25	181.25	106.75	120.75	104	160.5	183.25	139.75	129	138.629	40.6457	52.0004	1.04	1.715	30	94.25	134.5	187	100.5	103	83.75	144.25	194	95.5	109	86	123	171	93	102.75	153.064	44.0644	49.1892	2.355	1.135
OHJ	AE	70927.8	117.797	34.1501	47.6726	1.385	1.39	24.05	74.5	127.5	178.75	89.25	92.25	81.5	139.25	188.75	118.75	109.25	81.25	120.5	178	99.75	93.25	151.615	58.7564	66.6213	1.725	1.52	24.95	81.25	120.5	1273	132.25	105.25	159	328	3064	873	338.25	77.5	134	480.5	117	106.5	164.807	38.2956	48.4201	1.38	1.29
no antibody			67.045	29.6481	62.4761	1.195	2.355	24.25	86.25	131.5	187.75	89.5	100	87.5	127.5	177	88.5	93.25	66.5	115.75	167.75	77.75	83	67.045	29.6481	62.4761	1.195	2.355	24.25	86.25	131.5	187.75	89.5	100	87.5	127.5	177	88.5	93.25	66.5	115.75	167.75	77.75	83	67.045	29.6481	62.4761	1.195	2.355
[truncated: 170 more columns]

## Sheet: FC_Z_BCG_Route
ID	Group	Mtb.burden	Plasma.Wk8.HspX.IgG1	Plasma.Wk8.PPD.IgG1	Plasma.Wk8.LAM.IgG1	Plasma.Wk8.PstS1.IgG1	Plasma.Wk8.Apa.IgG1	Plasma.Wk8.HspX.IgM	Plasma.Wk8.PPD.IgM	Plasma.Wk8.LAM.IgM	Plasma.Wk8.PstS1.IgM	Plasma.Wk8.Apa.IgM	Plasma.Wk8.HspX.IgA	Plasma.Wk8.PPD.IgA	Plasma.Wk8.LAM.IgA	Plasma.Wk8.PstS1.IgA	Plasma.Wk8.Apa.IgA	Plasma.ToC.HspX.IgG1	Plasma.ToC.PPD.IgG1	Plasma.ToC.LAM.IgG1	Plasma.ToC.PstS1.IgG1	Plasma.ToC.Apa.IgG1	Plasma.ToC.HspX.IgM	Plasma.ToC.PPD.IgM	Plasma.ToC.LAM.IgM	Plasma.ToC.PstS1.IgM	Plasma.ToC.Apa.IgM	Plasma.ToC.HspX.IgA	Plasma.ToC.PPD.IgA	Plasma.ToC.LAM.IgA	Plasma.ToC.PstS1.IgA	Plasma.ToC.Apa.IgA	Plasma.pi.HspX.IgG1	Plasma.pi.PPD.IgG1	Plasma.pi.LAM.IgG1	Plasma.pi.PstS1.IgG1	Plasma.pi.Apa.IgG1	Plasma.pi.HspX.IgM	Plasma.pi.PPD.IgM	Plasma.pi.LAM.IgM	Plasma.pi.PstS1.IgM	Plasma.pi.Apa.IgM	Plasma.pi.HspX.IgA	Plasma.pi.PPD.IgA	Plasma.pi.LAM.IgA	Plasma.pi.PstS1.IgA	Plasma.pi.Apa.IgA	Plasma.Wk8.HspX.R2A	Plasma.Wk8.PPD.R2A
05G	Hi-ID	50	-0.0518262	-0.268035	1.2046	-0.499984	0.673383	0.679618	2.10146	1.36461	0.197659	1.38875	-0.746299	-0.877083	0.750469	-1.29222	-0.790203	-0.101552	-0.497481	-0.357246	-0.436232	-0.263109	1.7712	2.04312	0.335013	0.311466	1.44294	-1.61873	-0.758988	-0.382245	-1.16204	-0.718327	1.52697	0.276901	-0.0644366	-0.292539	-0.0711901	2.21378	2.48251	0.559356	0.194819	1.61374	-0.201028	-0.621211	-0.224161	-1.06905	-0.531448	-0.162617	-0.22882
077	ID/AE	22800	-0.491175	-0.163766	-0.0868022	-0.39121	-0.24258	-0.193647	0.113374	-0.735072	-0.484202	-1.08289	-0.404923	0.955521	-0.146075	-0.424167	-0.206478	-0.464188	-0.379285	-0.513232	-0.608596	-0.306902	-0.708116	0.254473	-0.937058	-0.497939	-1.13529	-1.12982	2.13719	-0.584885	-0.598	-0.55368	-0.450695	-0.406626	-0.395692	-0.526894	-0.338088	-0.929771	0.0021016	-0.650932	-0.465962	-1.06713	-0.740851	0.358952	-0.411791	-0.278522	-0.310639	0.574496	-0.197985
07C	IV	0	-0.41182	-0.441649	2.53872	-0.0287506	0.00302644	-0.302742	-0.232398	1.45866	-0.194044	0.6804	0.15723	0.39123	2.6576	0.137856	-0.481893	-0.932128	-0.452357	0.163013	-0.228367	-0.260002	-0.340407	-0.667797	-0.206364	-0.081539	-0.27626	-0.89258	0.468511	-0.0100769	-0.537117	-0.802231	-0.373749	0.285697	-0.199996	-0.0775699	-0.20335	-0.213657	-0.881152	-0.441287	-0.281473	-0.405961	-0.803235	1.04039	0.00534178	-0.651878	-0.473609	0.35762	0.0195128
07E	Lo-ID	9.64562e+06	-0.196083	-0.24704	-0.460771	-0.260926	-0.251012	0.537827	1.83885	-0.460895	-0.225909	-0.0600272	0.187884	-0.745353	-0.281748	0.204776	0.328399	-0.640248	-0.702296	-0.536082	-0.851338	-0.560916	-0.505006	0.481199	-0.272149	-0.388282	-0.250445	0.0854302	0.188972	-0.660136	-1.32861	-0.319944	-0.462582	-0.659036	-0.511864	-0.82543	-0.416026	-0.362853	0.623136	-0.0744989	-0.346586	0.390461	0.0854302	-0.204677	-0.517372	-1.28397	0.204059	-0.105589	-0.228358
0BD	AE	90895.5	-0.672712	0.106041	-0.493569	-0.491761	-0.189229	-0.519742	-0.863517	-0.506419	-0.339092	-0.116313	0.910993	0.607616	-0.281415	-0.24137	0.0803346	-0.486782	-0.020088	-0.515481	-0.530566	-0.294655	-0.350214	-0.30527	-0.348869	-0.0749339	-0.36659	0.182314	0.11012	-0.559941	0.441029	0.0358913	-0.288457	1.00944	-0.449987	-0.0806273	0.0282132	-0.549559	-0.925544	-0.391047	-0.163074	-0.652042	0.112915	0.385434	-0.161548	0.482387	0.663035	-0.59983	-0.183168
0E1	IV	0	0.033586	0.961566	2.29096	1.38925	0.26391	1.13704	3.25006	2.49099	0.733113	2.34469	-1.82407	-1.20646	0.436976	-0.42136	-0.50919	-0.30269	-0.0978334	-0.424857	-0.318704	-0.220266	1.29064	2.31702	0.678174	0.235603	1.49067	-2.09965	-1.43005	-0.396606	-0.795984	-1.05091	-0.262337	-0.342544	-0.417937	-0.525912	-0.236541	0.753952	1.47832	0.295213	0.111303	1.58546	-2.60071	-1.42247	-0.462614	-1.03293	-0.950429	0.889576	-0.0774012
0EN	ID/AE	501479	-0.545838	-0.0841539	-0.219136	-0.209574	-0.145153	-0.56591	-1.04613	-0.617247	-0.469338	-0.801727	-1.3719	-0.69502	-0.351275	-0.731036	-0.440054	-0.287826	-0.325825	-0.428914	-0.437552	-0.26089	-0.536419	-0.515127	-0.621965	-0.364204	-0.870334	-0.810538	-0.463751	-0.407921	-0.775135	-0.518436	-0.301405	-0.245268	-0.122027	-0.348894	-0.257032	-0.575527	-1.04667	-0.734052	-0.46913	-1.05628	-0.364748	-0.252164	-0.305065	-0.455417	-0.0167892	0.100817	-0.18003
0MI	Hi-ID	67930	1.33849	2.23115	-0.212957	0.476274	0.804897	2.18864	1.7635	2.45028	1.23484	2.99879	0.730446	1.84347	1.47349	4.48496	1.99286	0.392232	1.01595	-0.426545	-0.0873784	-0.0267291	1.64184	1.11265	0.700812	0.442411	2.00892	-0.881268	0.132191	-0.0508289	0.105728	0.142746	1.15157	1.38041	-0.410606	0.71686	0.130706	1.68418	0.925135	0.604005	0.441155	1.4198	-0.0858765	0.159528	0.0838133	1.55908	0.858449	-0.767575	0.0771515
0NF	ID/AE	397671	0.55851	0.40198	-0.0732181	0.0644078	1.139	-0.612658	-1.05873	-0.55616	-0.305888	-0.781526	-0.0500619	-0.503069	1.40244	0.403465	0.200232	-0.00377391	-0.359562	-0.347613	-0.439423	0.282743	-0.301332	-0.776543	-0.694962	-0.366777	-0.867008	-0.491221	-0.414081	0.0629338	-0.235971	0.0673125	0.804509	0.0756049	-0.230623	0.056099	10.5862	-0.0752268	-0.210721	-0.546965	-0.328642	-0.770567	-0.36255	-0.166891	2.65183	0.967303	0.461486	-0.777475	-0.133208
0NR	IV	30	-0.132631	0.434412	0.442518	0.843578	0.430186	0.121544	0.0576743	0.188219	-0.180365	0.00576004	0.74319	0.706087	0.0978526	0.940207	0.328093	-0.257228	-0.116821	-0.361241	-0.166174	-0.0371525	0.0411995	-0.439674	-0.5476	-0.435405	-0.492238	0.436153	-0.046852	-0.333623	0.0309814	0.172821	-0.437201	0.00429495	-0.481435	-0.0836871	-0.17775	-0.403322	-0.72965	-0.823039	-0.441631	-0.649863	-0.362144	-0.0767305	-0.452756	-0.106164	-0.388545	-1.03151	-0.156251
0TL	Hi-ID	2120	-2.23592	-0.3953	-0.511201	-0.585794	-0.222602	-0.15102	-0.648454	-0.169688	-0.00299475	-0.0334989	-1.21057	0.123291	-0.408564	-0.557309	-0.059997	-2.98579	-0.885529	-0.529578	-0.766551	-0.657208	-0.244247	-0.476491	-0.848303	-0.457167	-0.514547	-1.27869	-0.95238	-0.711535	-1.54007	-1.01406	-3.0201	-0.952212	-0.533252	-0.772661	-0.691141	-1.32998	-1.12798	-0.956039	-0.507395	-0.609161	-1.2276	-0.691473	-0.703837	-1.50575	-1.00419	-0.0906613	0.0331465
0TM	Lo-ID	29030	-0.35853	-0.441189	-0.509534	-0.601897	-0.357196	-1.06789	-0.999664	0.0517225	-0.253898	-0.356826	-0.136983	-0.269726	-0.533723	-0.295251	-0.300765	0.428183	-0.52344	-0.513171	-0.588378	-0.330007	-0.328249	-0.139178	-0.363197	-0.185303	-0.0699731	0.0881773	-0.192917	-0.526783	-1.13405	-0.675201	0.0820297	-0.505162	-0.461129	-0.48398	-0.311183	-0.973124	-0.591407	-0.311392	-0.307302	-0.652046	0.0881773	0.0951197	-0.47508	-0.847715	-0.423531	0.0126092	-0.221748
CZRJR	AE	765932	0.534737	-0.0144616	2.7766	-0.243602	0.0876583	-1.25292	-0.30644	2.30013	0.340452	0.342568	-0.147327	0.918936	2.11599	1.20738	2.30896	0.0644443	-0.446438	-0.320148	-0.546176	-0.225846	-1.06496	-0.616608	-0.540684	-0.272739	-0.672042	0.754848	0.367464	0.0487743	0.736555	0.756388	1.96129	1.42803	6.8261	2.44594	2.83543	-0.852154	0.710712	0.710253	-0.341189	-0.152444	1.62232	1.59135	7.94122	4.78373	4.26479	0.244892	-0.140435
DF2A	IV	0	6.80611	6.40095	1.78427	3.16618	1.22341	0.103031	0.719923	2.48564	0.989074	1.23454	0.655955	1.21475	3.10187	1.40189	0.361746	0.587795	0.559716	-0.470105	-0.356266	-0.117663	-0.238067	-0.357044	0.366278	-0.112265	-0.36247	-0.622704	0.243153	-0.394912	-0.227204	-0.473149	0.847461	0.9243	-0.144947	0.120238	-0.0128917	-0.263026	-0.162651	0.334387	-0.00848592	-0.251533	0.961307	0.882066	0.556995	0.464049	0.430368	-0.0406852	1.92587
DF3A	IV	0	0.225445	0.156774	1.37077	1.86919	-0.0990614	0.251406	-0.00380639	2.96637	0.356323	2.44264	-0.0921559	-0.138197	0.00548109	0.19725	-0.347704	-0.0626617	0.0957735	0.828406	0.795721	-0.185275	0.26402	0.093761	0.523999	-0.0013574	2.66243	1.78957	0.611325	0.0291087	0.351483	-0.364941	0.542363	-0.158395	0.692909	0.498947	-0.230341	0.4563	-0.256426	0.521708	0.0115083	2.56461	0.92441	0.157985	0.0233615	0.311681	-0.399414	0.45492	-0.178411
DF4X	ID/AE	110	-0.263667	1.00288	1.6126	3.84581	0.102842	-0.621777	0.192747	-0.347878	-0.491431	-0.614711	2.71472	0.30942	0.653144	1.44924	0.235828	-0.610735	-0.456317	-0.491193	-0.315148	-0.337787	-0.323186	-0.41393	1.76777	-0.197019	-0.156891	2.21301	-0.516855	-0.483652	-0.446072	-0.703895	-0.871037	-0.440006	0.00478777	-0.10182	-0.237072	0.351875	0.915421	0.317209	-0.144661	-0.233639	2.59765	-0.302491	-0.218819	-0.338659	-0.668027	-0.272663	-0.147806
DF5T	Lo-ID	160711	0.169772	-0.344815	-0.507499	-0.606911	-0.303908	-0.720734	-0.687597	-0.806127	-0.413865	-0.583409	-0.924017	-0.502944	-0.55289	-1.12203	-0.783662	0.33669	-0.169217	-0.121511	1.31313	-0.0937175	1.01182	0.535102	-0.666632	0.3268	0.17274	0.517921	0.172957	-0.0663655	0.527595	0.90623	0.837442	0.145078	0.178178	2.24037	0.105785	0.070073	-0.00648109	-0.720091	0.142152	0.0795133	2.23451	0.758738	0.276746	1.52622	2.42468	0.706659	-0.208608
DF7X	Lo-ID	860350	-0.125202	-0.487747	0.157921	-0.467273	-0.307185	2.09357	-0.0388624	0.413059	0.168395	0.444091	0.0495366	-0.500703	-0.237403	-0.681488	-0.604829	-0.600629	-0.464107	-0.42497	-0.403237	-0.393987	0.663849	0.794754	-0.560134	-0.188335	0.00161768	1.13099	-0.126966	-0.433537	-0.525367	-0.310547	0.379939	-0.18599	2.51143	0.381214	0.346728	0.871568	0.435839	-0.364981	-0.0842489	0.200804	0.468876	0.0139514	1.4264	0.210631	0.482734	-0.0726528	-0.198353
DF8J	Hi-ID	39765	2.40878	0.919224	-0.480586	-0.129868	0.239132	-0.0867633	-0.386628	-0.0385206	0.0875442	-0.49905	1.09677	1.21786	-0.0757687	1.01609	1.19307	0.900911	-0.315159	-0.510636	-0.519907	-0.306889	-0.593834	-1.09211	-0.402474	-0.365224	-0.876692	0.627304	0.389648	-0.474662	-0.340274	-0.105104	2.06926	-0.601911	-0.500285	-0.696039	-0.10089	-1.01074	-1.47015	-0.721662	-0.366319	-1.28353	1.21414	0.235907	-0.318226	-0.0313235	0.403174	1.60346	0.56539
DF9F	Hi-ID	42860	0.203705	0.909515	1.87451	2.6767	0.587663	0.882448	0.708386	0.652149	-0.0674744	1.42655	-0.546366	0.133349	1.53182	0.58437	-0.483422	-0.724955	-0.459571	-0.481441	-0.38323	-0.302905	0.211087	-0.69294	-0.627105	-0.317187	-0.512339	0.0486692	-0.562356	-0.501741	-0.58793	-1.14437	0.42606	-0.257128	-0.219795	1.20983	-0.181938	-0.620299	-0.772108	-0.803551	-0.416028	-0.754444	-0.178011	-0.31536	-0.267454	0.139705	-1.30019	-0.0857764	-0.130857
DF9I	Lo-ID	700608	-0.726285	-0.403555	-0.510187	-0.243896	-0.304322	-0.936574	-0.936903	-0.316568	-0.406304	-0.838492	-0.456245	-0.430625	-0.488708	-0.358819	-0.568035	-0.629923	-0.539046	-0.514421	-0.605828	-0.280854	-0.62116	-0.902368	-0.951773	-0.496189	-1.33522	-0.636487	-0.389459	-0.500684	-0.799809	-0.668503	-0.196298	0.358237	-0.144209	-0.0647436	0.0754323	0.434293	-0.0842286	0.787489	0.0767087	-0.425656	-0.366124	0.255475	-0.0541539	0.19557	-0.23984	-0.979976	-0.197812
DFB3	AE	71910	-0.365937	-0.625974	-0.499455	-0.606517	-0.410005	-0.547537	0.104603	-0.721812	-0.390616	-0.453956	-1.12438	-0.525537	-0.470497	-0.63245	-0.730232	-0.757891	-0.591074	-0.496077	-0.603486	-0.232348	-0.896639	0.0239502	-0.400499	-0.237869	-0.389987	-0.210743	-0.257163	-0.420674	-0.31606	-0.691387	-0.555975	-0.365289	-0.505133	-0.515319	-0.40661	0.033932	1.52585	0.0486742	0.0098854	0.1701	0.106235	0.359257	-0.496019	0.217848	-0.419466	-0.268679	-0.245496
DFG1	IV	1549460	-0.198842	0.207989	-0.156528	0.149112	0.82317	-0.131073	-0.40381	0.0714116	-0.235466	0.0310679	1.22328	0.444152	0.439332	0.647421	0.00226843	-0.437201	-0.286277	-0.303361	-0.420696	0.117539	-0.708316	-0.449845	-0.714606	-0.451082	-0.668995	0.413909	-0.0536991	0.00754044	0.00757842	-0.755427	-0.516654	-0.208332	-0.330425	-0.342627	0.0848275	-0.543841	-1.1499	-0.720322	-0.508597	-0.793955	0.263009	-0.648033	-0.148541	-0.382279	-1.01096	0.782382	0.329188
DFH1	AE	22125	0.218797	-0.223469	-0.458072	-0.382322	-0.23805	-0.445093	-0.0902416	-0.714307	-0.390951	-0.581495	-0.137488	-0.345835	-0.478702	-0.241964	1.52492	-0.327868	-0.556174	-0.512917	-0.573248	-0.301461	-0.997875	-0.435537	-0.650592	-0.324296	-0.743111	-0.65303	-0.695746	-0.534757	-0.250988	-1.77077	0.546796	-0.504098	-0.46851	-0.486978	-0.311689	-1.15845	-0.605776	-0.692877	-0.293367	-0.616444	-0.137488	-0.183936	-0.527587	0.245382	-1.28285	1.58378	-0.202811
DFI0	AE	61548.7	-0.087694	-0.488121	-0.434395	-0.342862	-0.346396	1.17587	2.28332	-0.106963	0.131411	-0.388297	-1.14128	-1.16238	-0.479637	-0.745394	-0.680382	0.261813	-0.54522	-0.502122	-0.388351	-0.147029	-0.531294	0.491258	-0.71208	0.169404	-0.832219	-0.0206278	-1.32555	-0.511087	-0.119099	-0.307362	0.163951	-0.289571	1.1428	1.22139	-0.0961704	-1.23533	-0.616663	-0.465213	-0.173142	-1.20774	0.0762188	-1.13627	0.318715	0.718521	-0.265916	-0.0395783	-0.215011
DFJ3	AE	74120	-0.610735	-0.384397	-0.338407	-0.129142	-0.302905	-0.984878	-1.30734	-1.00861	-0.474829	-1.10967	-1.0455	-0.330239	-0.409786	0.425228	-0.712834	-1.34206	-0.550537	-0.512123	-0.633346	-0.363389	-1.49579	-1.72777	-1.25948	-0.660374	-1.56452	0.0216119	-0.512957	-0.529278	-0.821573	-0.723586	-0.449596	-0.286223	-0.388731	-0.303539	-0.275792	-0.381371	-0.939713	-0.966988	-0.531771	-1.19667	-0.787327	0.056693	-0.391743	-0.384591	0.00218936	-0.260818	-0.204035
DFL6	ID/AE	3057750	-0.574749	-0.397123	-0.502704	-0.595014	-0.336219	-0.0823166	-0.303631	-0.599799	-0.315795	-0.212303	0.278789	0.0941855	-0.514401	-0.451517	-0.414997	1.00705	-0.0345311	-0.513989	-0.520395	-0.319988	-0.787962	-1.00499	-0.988518	-0.410593	-0.883539	-1.07147	-0.376776	-0.576961	-0.817809	-0.894009	-0.0795764	-0.490897	-0.510419	-0.608092	-0.403169	0.205527	-0.573356	-0.742849	-0.252636	-0.378667	-0.0587746	-0.779646	-0.553753	-0.842559	-0.456393	-1.27248	-0.196142
DFTA	IV	0	-0.575642	1.95771	-0.445454	-0.0867173	0.223744	0.347456	1.47245	5.03191	2.5179	1.90451	0.902825	0.803803	0.640682	0.383974	0.879678	-0.381825	-0.193085	-0.497013	-0.506452	-0.153507	-0.894102	-0.97407	1.72405	0.728674	-0.419775	0.0933667	-0.551876	-0.0503624	0.252367	-0.191096	0.00581048	-0.425725	-0.504272	-0.556214	-0.336175	-1.45806	-1.27552	0.94885	0.264565	-0.73486	-0.729147	-0.989715	0.110742	-0.159327	-0.613662	-0.881552	0.264762
DFVJ	Lo-ID	19330	-0.79144	-0.532853	-0.50789	-0.444264	-0.375942	0.554246	1.026	-0.616927	-0.377082	-0.356219	0.616706	0.0305334	-0.516572	-0.618007	0.667169	-0.0567223	-0.58053	-0.518022	-0.709457	-0.414214	-0.0630655	0.707439	-0.783671	-0.329204	-0.483321	-0.883045	0.0457715	-0.593623	-1.00805	-0.72165	-0.450321	-0.300736	-0.480178	-0.546715	-0.400297	1.02458	1.56446	-0.409902	-0.217042	0.80755	0.0963843	-0.0659742	-0.550726	-0.804832	-0.638042	0.152461	-0.201271
DFW0	AE	54215	-0.424	-0.574606	-0.511437	-0.652446	-0.264021	-0.565765	-0.891143	-0.658173	-0.420793	-0.558034	-1.24785	-0.628736	-0.541505	-0.965329	-0.645044	-0.371195	-0.358926	-0.373093	0.169947	-0.269868	-0.024141	0.514157	-0.27756	-0.197043	-0.102879	-1.24785	0.268553	-0.418673	-0.218659	-0.228876	2.41426	1.3507	1.09776	6.45422	0.314876	2.08167	1.08848	1.36187	0.527744	1.67401	0.576007	0.540635	1.04609	2.13433	1.66499	-1.06941	-0.191749
DFWG	ID/AE	1.12327e+06	0.776557	1.25265	-0.448615	-0.11402	1.41373	0.868388	1.21964	0.103691	-0.333908	-0.0789434	-0.546366	0.840066	0.0144997	0.559852	0.411009	1.52592	1.00779	-0.489353	-0.0651197	0.525121	0.092309	0.307106	0.153301	-0.433629	-0.101448	0.00550939	1.0145	-0.176745	-0.221462	0.261978	3.59459	1.56588	-0.463044	-0.00744712	1.83118	1.74785	0.975975	0.750677	-0.281065	0.731215	0.507215	1.30207	-0.0491655	1.20041	0.860969	-0.500782	0.0539891
DFX2	Lo-ID	169720	0.0697064	-0.443108	-0.516053	-0.628815	-0.271638	0.241878	0.844946	-0.326436	-0.425003	-0.130062	0.0356784	-0.603257	-0.522773	-0.822044	-0.669109	0.606432	-0.517225	-0.514731	-0.599133	-0.303923	1.18158	1.05538	0.0781089	-0.128018	0.160305	0.682395	-0.603257	-0.532436	-0.780539	-0.644741	0.516978	-0.440143	-0.511747	-0.467907	-0.28778	0.181297	-0.190008	-0.0818341	0.107907	-0.318843	0.165022	-0.462164	-0.538647	-0.422559	-0.705661	0.446736	-0.190445
DFX6	AE	697082	-0.373177	-0.528983	-0.513559	-0.655989	-0.377545	0.0906439	0.00872692	-0.147957	-0.354437	-0.630313	-0.52854	-0.483359	-0.570196	-0.847074	-0.759585	-0.51403	-0.503938	-0.514058	-0.63862	-0.385085	0.541893	0.439441	-0.0831862	-0.278822	-0.553495	-0.0294078	-0.169624	-0.568998	-0.60098	-0.483931	-0.680491	-0.470054	-0.51057	-0.602545	-0.298375	0.973234	-0.0312453	-0.103961	-0.30474	-0.62064	0.362768	0.138193	-0.424615	-0.0519999	0.354281	0.0354688	-0.20885
DFXH	ID/AE	86330	-0.789389	-0.541825	-0.51262	-0.604003	-0.360056	-0.510519	-0.604479	-0.825611	-0.48759	-0.678139	-1.40536	-0.627313	-0.526008	-0.912382	-0.796432	-0.449779	-0.534563	-0.511622	-0.625259	-0.354513	0.244644	0.0987854	-0.598772	-0.188167	1.26595	-1.19392	-0.19188	-0.535489	-0.897427	-0.199601	-0.286263	-0.424182	-0.512916	-0.617364	-0.378532	0.822829	-0.250418	-0.366435	-0.146111	0.801689	-0.625658	-0.398601	-0.517204	-0.549733	-0.647224	-0.719964	-0.220378
DFXL	Lo-ID	37530	0.356782	0.000373642	1.11212	-0.183732	-0.12959	-0.866396	-0.866041	0.382714	0.400918	-0.424286	-0.212584	-2.17708	-0.102183	-1.00942	-0.436543	0.327376	-0.598737	-0.489735	-0.530581	-0.154902	-0.0564394	-0.206809	-0.319685	0.491972	1.30991	-0.306043	-2.18838	-0.501247	-1.08273	-0.7928	0.180342	-0.237968	0.962835	0.0831461	0.0729	-0.0554129	0.0816733	0.230949	0.392172	1.29497	1.26941	-1.70969	-0.130641	-0.608523	-0.277438	-0.652187	-0.211063
DFZ4	Lo-ID	116495	0.704042	0.0573204	-0.412227	-0.223761	0.0630962	-0.140507	-0.665735	-0.893207	-0.395013	-0.448106	1.01603	-0.0635772	-0.288852	0.199303	-0.352832	-0.42466	0.0238108	-0.427188	-0.337847	0.0522857	0.565266	0.0680377	-0.784734	-0.148627	-0.275173	-0.243453	-0.562495	-0.254729	-0.257554	-0.376838	0.114609	-0.180728	-0.426794	-0.161052	-0.0193339	2.6846	0.377033	-0.653518	-0.0324908	0.730648	2.81757	0.286727	-0.254149	0.681826	0.195881	-1.03426	-0.164344
DG02	Hi-ID	60880	-0.405498	-0.418938	-0.283998	0.0255295	-0.264386	-0.626634	-0.840674	0.508565	-0.0843097	-0.0608044	3.22444	4.87004	-0.298064	0.5096	0.543438	0.0541877	-0.340234	-0.509432	-0.214782	-0.245349	-0.504001	-0.0997004	-0.404566	-0.31783	-0.034184	1.91445	0.592428	-0.403124	-0.0740853	-0.0300393	0.371213	-0.447695	-0.501824	0.00984154	-0.313037	0.950787	0.427274	-0.104104	-0.162438	0.209202	2.77145	1.74963	-0.357993	0.5096	0.454886	-0.904986	-0.192847
DG05	ID/AE	310350	-0.324991	-0.114225	-0.221726	0.911565	-0.198427	-0.813867	-1.34664	-0.998453	-0.526036	-0.692466	-0.995272	-0.487814	-0.312198	-0.246215	-0.453049	-0.624218	-0.0770608	-0.0336623	1.31712	-0.0478154	-1.41258	-1.3474	-0.967557	-0.592632	-0.846664	-1.15851	-0.424956	-0.39192	-0.343966	-0.345147	-0.374862	0.887924	0.821771	3.39665	0.637362	-1.38927	-1.34236	-1.01797	-0.638914	-0.975497	-1.26053	-0.248953	0.811563	1.28359	0.194364	-0.617051	-0.202626
DG49	Hi-ID	185198	0.169825	-0.429708	-0.0740148	-0.281613	-0.191785	0.625577	0.0303044	2.20583	1.44649	1.03154	0.233802	-0.31513	-0.291225	-0.00818056	-0.20708	-0.259535	-0.491633	-0.504129	-0.48325	-0.305709	-0.80099	-0.747688	-0.576253	-0.342559	-0.706085	0.0435174	-0.732171	-0.479625	-0.37514	-0.567173	-0.289146	-0.503715	-0.511726	0.631558	-0.383014	-1.25463	-1.43386	-0.735712	-0.435513	-1.08856	-0.165796	-0.528997	-0.526905	1.08767	-0.513159	-0.594547	-0.191301
DG75	IV	0	-0.952781	-0.36191	-0.276151	-0.387228	-0.386939	0.88652	0.25873	0.959454	-0.0610765	0.448597	0.143256	-0.0558892	-0.432506	-0.575504	-1.10157	-0.855239	-0.38962	-0.500327	-0.373505	-0.338247	0.477583	0.618674	-0.505015	-0.237193	-0.122075	-0.138862	0.305194	-0.464875	-0.591152	0.0183618	-0.381463	-0.471212	-0.500013	-0.502341	-0.413313	0.404822	0.365473	-0.59291	-0.303817	-0.195386	0.942591	0.373755	-0.475783	-0.610712	-0.814482	0.329637	-0.186205
DG82	ID/AE	11395	-0.391515	0.117119	-0.344754	-0.12937	-0.169914	-0.654594	-0.296102	0.310024	0.08106	0.0264971	-1.08877	0.0129652	-0.232266	0.0551946	0.00900893	-0.330601	-0.374572	-0.487619	-0.282422	-0.206183	-0.477851	-0.14688	-0.28546	-0.121186	-0.223285	-1.32983	-0.671367	-0.425727	-0.361447	0.12858	-0.026031	-0.12474	0.713157	0.229713	-0.00563876	-0.629948	-0.446864	0.0305089	-0.0781473	-0.14134	-0.867789	-0.544639	0.439268	0.198043	0.274721	-0.466631	0.05397
DJF9	IV	45	-0.245395	-0.0360771	0.673089	-0.229757	-0.223651	-1.34579	-0.972611	1.93797	0.717982	0.641913	1.38525	-0.474395	-0.0754881	0.161347	0.435617	0.580844	-0.140113	2.71837	0.506152	0.447925	-1.71846	-1.60178	-0.681334	-0.364706	-1.16109	1.04768	-0.59008	2.14272	0.732767	1.80581	0.448055	-0.00812721	1.59459	0.126788	0.0808526	-1.81829	-1.8856	-0.859466	-0.49009	-1.34223	1.31023	-0.504388	0.554153	0.782098	1.38291	-0.547644	-0.211793
HBN	ID/AE	315270	-0.328663	-0.43642	-0.420145	-0.386773	-0.12513	-0.986782	-1.01065	-0.732922	-0.549216	-0.87729	-0.546366	-0.883702	-0.463562	-0.326233	-0.0788889	0.0899826	-0.605581	-0.513697	-0.702881	-0.408165	-0.112845	-0.19507	-0.533012	-0.372785	-0.453017	0.11023	-0.853872	-0.545257	-0.823271	-0.635822	-0.514728	-0.627901	-0.515443	-0.682364	-0.461234	0.0645409	-0.604689	-0.445509	-0.335217	-0.336761	-0.0828863	-0.346761	-0.518253	-0.522181	-0.568315	-0.153044	-0.155072
HCA	AE	187339	-0.357748	-0.612445	-0.300319	-0.604174	-0.280148	-0.698225	-0.717601	-0.63382	-0.335587	-0.708588	-0.463813	-0.213034	-0.143697	-0.149362	-0.0716682	-0.25181	-0.561947	-0.52308	-0.651772	-0.36021	-1.01058	-0.670564	-0.724879	-0.367859	-0.854416	-0.694963	-0.398986	-0.5913	-0.481047	-0.239608	-0.662318	-0.402479	1.99477	-0.244538	0.200222	-0.540745	0.0364761	-0.450602	-0.278971	-0.566153	-0.595899	0.116882	2.06787	0.522301	0.40591	0.460961	-0.193032
HCE	Hi-ID	29595	0.0440362	0.388661	-0.349798	-0.144271	0.126309	-0.00658358	0.0134201	-0.0675848	-0.15824	0.474996	-0.000285878	-0.182092	-0.0701018	0.493568	3.65689	-0.157412	-0.489586	-0.534528	-0.644261	-0.420907	1.09177	0.536769	0.638457	-0.00325996	0.258771	0.867018	-0.512957	-0.677375	-0.683775	2.37741	0.469316	-0.238514	-0.516434	-0.303536	-0.248968	3.29788	2.2685	0.513013	0.294198	1.6532	1.63796	3.97963	-0.579727	-0.536094	4.43599	-0.335005	-0.148877
HCL	IV	45	1.49174	5.87239	0.938989	0.937184	1.06545	3.7691	3.33659	3.73236	9.53436	4.15133	0.128761	4.57776	1.22404	3.09005	1.75494	0.38949	3.14307	0.352867	0.445021	0.447002	2.06673	1.70496	0.686104	3.9042	1.05486	-0.921437	2.26643	0.750675	2.7145	2.27844	0.839094	3.03709	0.159053	0.361756	0.282219	1.78141	0.990894	0.379014	3.04445	1.1949	0.0162395	2.46867	0.571892	2.35459	1.69983	0.566167	10.2167
O96	Lo-ID	58960	-0.824836	-0.370862	-0.507311	-0.385515	-0.364957	-0.448832	-0.253907	-0.0568677	-0.0907505	-0.0387798	0.183368	-0.165012	-0.519576	-0.444804	-0.627659	-0.530768	-0.467552	-0.506784	-0.558649	-0.346497	-1.07789	-0.878217	-0.785855	-0.532904	-0.857145	-0.566089	0.471904	-0.543717	-0.515793	-0.502862	-0.0762994	-0.116663	0.225826	0.438734	-0.219325	-0.355377	-0.393282	1.49494	0.643372	0.070836	0.104478	0.247804	-0.249354	0.998634	-0.0809296	-1.17635	-0.225081
OHJ	AE	70927.8	-0.423035	-0.479586	1.43979	1.57283	-0.20224	0.726512	0.603726	1.26778	-0.00143664	1.01318	-0.366124	-0.164805	1.38515	1.3783	0.126041	0.271102	-0.92798	-0.512469	-0.545363	-0.370005	1.01598	1.246	0.014468	0.0377692	0.862625	-0.230942	-1.21454	-0.526093	-0.320945	-0.347737	0.200272	-0.415709	3.43093	1.88905	0.121979	1.04804	0.997828	1.35211	0.373873	1.79218	-0.298533	-0.333606	2.35663	2.18774	2.07689	0.641528	-0.161178
[truncated: 78 more columns]

## Sheet: Raw_SigH
Group	Sample	HspX.IgG1	GroES.IgG1	PPD.IgG1	LAM.IgG1	PstS1.IgG1	Ag85.IgG1	ESAT6_CFP10.IgG1	Apa.IgG1	EBOV.IgG1	HspX.IgA	GroES.IgA	PPD.IgA	LAM.IgA	PstS1.IgA	Ag85.IgA	ESAT6_CFP10.IgA	EBOV.IgA	Apa.IgA	HspX.IgM	GroES.IgM	PPD.IgM	LAM.IgM	PstS1.IgM	Ag85.IgM	ESAT6_CFP10.IgM	EBOV.IgM	Apa.IgM
BCG	Pre IL33	729.75	467.75	406.5	3948.5	257.75	631	693.5	416.5	146.75	245.25	390.75	351.5	545.75	276.25	449.25	384.75	131.75	362.5	2430.75	1744.5	1663	1589	2267	2251	1790.5	220.5	1428.75
BCG	Pre II21	666.25	484.5	457.5	1375	277.5	678.75	791.25	448.25	139	280	576	528.5	581.5	393.5	632.25	557	133	493.25	1785.5	1783.5	1606	685.5	1910.75	2254.25	1756.25	253.25	1329
BCG	Pre HE06	254.75	171	152.5	224.75	138.5	251.5	257	152.5	145.75	265.75	795.5	779.75	272.75	531	1054	806.5	141.5	622	3065	3336.5	2838.25	1407.25	3685.25	4252	3837.5	587.5	2455.5
BCG	Pre HN69	1160.5	679.5	534.25	440	353	788.25	957.5	470.75	155.25	255.75	323.5	302	293	228	381.5	358.75	124.75	297.25	4019.5	4225.75	3522	2131.25	6944.25	4468.25	4049	478.5	2801.75
BCG	Wk7 IL33	570.75	323.75	259	231.5	173.25	421.5	513.5	276.75	146.5	197.5	415.5	403	204.25	300.25	529.25	443.25	123.25	367	2479.25	2587	2208.5	1289.75	2898.75	3395.25	2428	352.5	1751.75
BCG	Wk7 IJ42	336.25	203	166	1298.25	183.5	298.25	374.5	195.75	143.5	144.5	213.75	196.5	348.5	153.5	263.25	221	122.25	197.5	2832	2773	2344.5	2036.5	4221.25	4031.5	2807.5	272.75	1840
BCG	Wk7 II21	337.75	269.5	229.5	312.25	181.5	410.25	444.5	227.5	164.75	151.25	305	269.25	200	216	372.5	301	127.5	271.5	2466	2402	2238.5	789.25	3885.25	3834.5	2195	203.5	1736.25
BCG	Wk7 HE06	466.75	284.5	211.75	284	185.5	362.75	550.5	215	146	146.25	221.5	200	191	162.25	288.75	254.25	124.5	205	1997.25	4185.25	3602.5	1215.25	4344.75	5496.5	4597.75	352.5	2545
BCG	Wk7 HN69	563.5	334	297.5	5622.75	344.5	460.5	562.25	320.75	163.5	204	444.5	417.75	680.5	324.75	579.25	495.25	124.25	364	2904	2986	2623	1985.25	3919.25	4041.5	3108	231.25	2097
BCG	Nec II21	809	653	831.75	25818.8	795	983.25	2045.25	1063	153.5	187	349.5	387	1388.25	295	444.5	457.75	121.5	383.5	2520	3127.25	3345.25	1393	6195.75	4575.75	3298.75	230.75	2780.25
BCG	Nec HE06	1637	1077.5	1004.25	6520	640.5	1396.25	1813.5	1129	190	194.25	373	358.5	677.75	277.75	454.25	398.75	126.5	340.25	2039.25	4181.25	3538.25	1943.5	5091.75	6058.5	4630	359.75	2731.75
BCG	Nec HN69	887	708	570.25	2208.25	334	885	917.25	596.25	155.75	280.25	586.75	582.5	505	396.5	658	581.25	129.25	539	1345.25	1480.75	1402.25	625	1484	2078.5	1617	319.5	1304
SigH	Pre CK53	522	316.25	241.5	2020.5	211.5	458.5	671.25	264.75	146.5	160.5	393	341.5	426.25	297.5	455	396.75	128	333	2058.75	3368	3082	621.25	2956.5	5265.25	3569.5	269.25	2123.5
SigH	Pre IJ23	459	292.5	259.5	2500	188	362.5	451.5	272	142.25	182	304.5	302.5	452.75	225	358	304.5	117.75	293.75	2104.5	1294	1240.25	1117.5	1754	1709.25	1195.5	182.25	995.5
SigH	Pre IM73	546	291	257.5	259	202.25	358.75	476.25	363.25	152.75	195	328.5	321	207.25	251	423.75	371	195.25	341.75	786.5	1697.75	1717.75	790.5	2683.5	2432.5	1698.25	302	1087
SigH	Pre IN85	312.5	208	180.5	378.5	161.5	292.5	309.25	205	151.5	154	291.5	252.75	212.25	204.5	352.5	283.5	125	265.25	740.75	1473.5	1409.5	586.5	1849.5	2136.75	1575.5	245	1058.75
SigH	Pre II07	981.5	552.5	451	359.5	293	770.75	973	418.25	156.5	209.75	472.5	455.5	231.75	328.5	529.25	476.5	129.5	376.5	673.5	2064.5	1709.5	1044.75	3626.25	2800.5	2149.75	265	1504.75
SigH	Wk7 CK53	813	542.5	412.5	884	305.25	663.5	789.5	397.5	154	214.25	546.75	517.25	254.75	384.5	693.5	592	129.25	441.75	3561.75	3214	3041.75	1334.25	3448.75	4755.5	4437.75	217.75	2502.25
SigH	Wk7 IJ23	410.75	266	215.25	450	163.75	384	566.5	216.75	134.5	143.5	218.25	200.75	272.25	162	278.5	249.5	124	217	990.25	2022	1928	3703.25	3101	2728	2287	338.25	1605.25
SigH	Wk7 IM73	725.5	426.5	350	4622.5	253.75	589	825.25	366.5	151.5	211.5	470.5	421.25	520.5	323.5	575.25	522	123	391.25	2624.5	2802.25	2492.75	2949.5	4408.5	3573.5	2776.25	230.5	2138.25
SigH	Wk7 IN85	971	539.5	421.25	1425	286.5	786.25	1228.5	379.75	155.5	152.75	285.5	250.5	362.5	208.5	345.5	335.5	124.25	268	2914.25	2424.5	2049	919.25	2323	3036.25	2263.25	255	1629.5
SigH	Wk7 II07	202.5	154.25	128.5	7234	237	209	191	200.75	143	119.5	120.5	99.25	681.25	116.5	150	130	119.25	136	5942.5	4308.5	4193.5	3161.5	4731	5732.5	5083.25	409.5	3225
SigH	Nec CK53	591.25	419.75	369	19794.5	367.25	533.25	6513.5	504.5	142.25	293.5	823	755.5	1495.5	526	948.25	1026.5	129.75	669.75	3794.25	4322.75	3996.5	2192	4315	5783	5505.5	258.25	3093.75
SigH	Nec IJ23	12791.2	509.5	455.5	4280.5	299.5	669.75	841.25	552	160	1732.25	201.75	189.25	472.25	161.75	267.75	231	124	204	1335.5	2249	2195.5	3993	3792	2899	2481.25	363.5	1949
SigH	Nec IM73	1116	508	718.5	31280.5	301.5	683.5	1955	442.5	136.5	418.25	717.5	698.75	1681	458.25	817.5	878.5	127	579.5	1979.25	2367.5	2097	2543.25	4015	2916.5	2298	230.25	1764.25
SigH	Nec IN85	1855	1175.25	1023	11455	638	1288.25	1872.75	998.25	155.5	214	357.75	328.5	1207.5	245	402.75	413.5	126	332	2376	2437.75	2279	999	2411.5	2990.75	2330.25	243.5	1840
SigH	Nec II07	1626.75	140	126.75	9688.5	282	193.75	191.5	239	144.25	485.5	121.75	119.5	754.75	128.5	169.25	148	120.75	152.75	4468	3187.5	3113	1538	3177.5	4134.75	3346.25	291.5	2328.25
Unvax	Pre II46	379	230.25	165.5	373.75	204	301	459.75	206.5	182	195	510.5	482.5	248.5	473	645	544	126.75	430.5	2552	3014	2557	1234.25	4941.75	4688	4591	430.5	2004.5
Unvax	Wk7 DF30	628	364	311	265.5	202.75	473	580.5	348.25	141	205.5	471.5	429.75	212.25	299.25	571.5	458.75	131.75	409.75	552.5	1597	1449.5	452.25	1735.75	2195	1547	175	1041.25
Unvax	Wk7 II46	247.5	173.5	143	240.5	136.75	248	244.75	167.25	154	169.5	289	270.25	204	238	393	301.75	120	279	2131	3161	2905.5	1449	4048	4514	3482.5	410.5	2259.25
Unvax	Nec DF30	644.5	509	398.5	877.5	286.5	776	880	441.5	148.25	154.5	465.5	439.5	235.75	318	576.5	479.25	123.5	398	623.75	1515.75	1443	907.25	1959.75	2446.75	1882.25	206	1084.5

## Sheet: FC_Z_SigH
Group	Sample	Wk7.HspX.IgG1	Wk7.GroES.IgG1	Wk7.PPD.IgG1	Wk7.LAM.IgG1	Wk7.PstS1.IgG1	Wk7.Ag85.IgG1	Wk7.ESAT6_CFP10.IgG1	Wk7.Apa.IgG1	Wk7.EBOV.IgG1	Wk7.HspX.IgA	Wk7.GroES.IgA	Wk7.PPD.IgA	Wk7.LAM.IgA	Wk7.PstS1.IgA	Wk7.Ag85.IgA	Wk7.ESAT6_CFP10.IgA	Wk7.EBOV.IgA	Wk7.Apa.IgA	Wk7.HspX.IgM	Wk7.GroES.IgM	Wk7.PPD.IgM	Wk7.LAM.IgM	Wk7.PstS1.IgM	Wk7.Ag85.IgM	Wk7.ESAT6_CFP10.IgM	Wk7.EBOV.IgM	Wk7.Apa.IgM	Nec.HspX.IgG1	Nec.GroES.IgG1	Nec.PPD.IgG1	Nec.LAM.IgG1	Nec.PstS1.IgG1	Nec.Ag85.IgG1	Nec.ESAT6_CFP10.IgG1	Nec.Apa.IgG1	Nec.EBOV.IgG1	Nec.HspX.IgA	Nec.GroES.IgA	Nec.PPD.IgA	Nec.LAM.IgA	Nec.PstS1.IgA	Nec.Ag85.IgA	Nec.ESAT6_CFP10.IgA	Nec.EBOV.IgA	Nec.Apa.IgA	Nec.HspX.IgM	Nec.GroES.IgM	Nec.PPD.IgM
BCG	IL33	-0.399178	-0.619405	-0.672711	-0.61047	-0.856227	-0.696174	-0.70071	-0.632931	-0.308206	-0.374893	0.0696807	0.161326	-0.981677	0.176135	0.247806	0.0520175	0.0116426	0.0360864	-0.552465	0.218011	-0.186157	-1.08923	-0.228766	0.295358	-0.202208	1.26111	-0.493893
BCG	II21	-0.44119	-0.698861	-0.749196	-0.604603	-0.872168	-0.741102	-0.766605	-0.720686	1.49017	-0.500396	-0.783094	-0.810476	-0.996584	-0.882154	-0.759782	-0.845784	0.199842	-0.861543	-0.398125	-0.107932	-0.0484283	-0.78895	0.903773	0.776788	-0.430177	-0.500504	-0.321209	-0.333201	-0.236074	-0.00617358	0.0414435	1.07399	-0.144448	-0.0205078	0.321568	0.71163	-0.439955	-0.659678	-0.470603	0.00815881	-0.487207	-0.564942	-0.432709	-0.166703	-0.420357	-0.385201	0.865527	1.39372
BCG	HE06	-0.238859	-0.0513413	-0.248604	-0.568503	-0.268906	-0.148881	-0.183814	-0.216139	-0.27532	-0.495591	-1.18418	-1.19637	-0.821375	-1.36091	-1.29909	-1.17626	-0.440317	-1.29065	-0.70986	-0.329142	-0.30911	-1.04335	-0.378406	-0.243451	-0.541156	-0.951503	-0.901362	0.462486	2.66002	2.68462	0.397818	2.62303	2.75548	1.62859	3.13524	2.62861	-0.410089	-0.879943	-0.886289	0.056107	-0.933007	-1.03043	-0.913267	-0.325475	-0.868159	-0.704004	-0.332012	-0.356482
BCG	HN69	-0.444453	-0.736693	-0.71803	-0.167459	-0.588831	-0.755389	-0.757224	-0.623485	0.21935	-0.378513	0.566008	0.522499	-0.0237202	0.840007	0.829995	0.38733	0.503276	0.448282	-0.679585	-1.64042	-1.40677	-0.983302	-1.30067	-1.21339	-1.46509	-1.21011	-1.5202	-0.401894	-0.414888	-0.429868	-0.437724	-0.615015	-0.374769	-0.62049	-0.296235	-0.260839	-0.237378	1.26845	1.35468	-0.318234	1.45908	1.18317	0.7392	0.828931	1.59218	-0.845302	-2.49315	-2.13211
SigH	CK53	-0.280801	-0.0211301	-0.0682382	-0.597274	-0.177433	-0.145514	-0.540019	-0.16493	0.200635	-0.124196	0.593464	0.722889	-0.871833	0.580519	0.839965	0.551192	0.615188	0.646502	-0.249017	-1.04757	-0.899935	0.0918204	-0.397103	-1.21666	-0.4443	-0.48904	-0.596415	-0.345658	-0.248065	-0.169907	-0.271318	0.0806202	-0.346292	2.60484	0.0610637	-0.570877	0.109543	1.71637	1.78714	0.559421	1.51619	1.7979	2.15868	0.646927	1.97684	-0.200757	-0.259496	-0.251655
SigH	IJ23	-0.381962	-0.492381	-0.56415	-0.606243	-0.681182	-0.419599	-0.511053	-0.558892	-0.815892	-0.382864	-0.483991	-0.575287	-0.870028	-0.545599	-0.436812	-0.436287	0.967109	-0.495692	-0.787246	0.408684	0.287846	1.12274	0.505489	0.514465	0.993101	1.83125	0.336493	3.73609	-0.00565665	-0.0415831	-0.552881	-0.0455448	0.13753	-0.286631	0.130312	0.908476	3.74944	-0.570553	-0.63328	-0.652824	-0.547785	-0.488188	-0.525465	0.967109	-0.58168	-0.717141	0.828631	0.739202
SigH	IM73	-0.31572	-0.167168	-0.265143	0.00906202	-0.34348	-0.00790474	-0.334731	-0.440306	-0.370537	-0.242671	0.659035	0.414233	0.069178	0.573452	0.554831	0.426257	-2.47075	0.293395	0.437653	0.619275	0.0715581	1.49165	0.317693	0.19725	0.395972	-0.589813	1.09848	-0.206527	-0.00342081	0.542606	3.59368	-0.135648	0.178269	0.540118	-0.323314	-1.31515	0.259231	1.86018	1.73297	2.82244	1.62957	1.53294	1.83672	-2.3043	1.36367	0.0870678	0.006263	-0.410574
SigH	IN85	-0.0441967	0.492405	0.284942	-0.481393	0.113708	0.731533	0.491262	0.0313535	-0.0378452	-0.286569	-0.0643843	-0.075757	-0.325933	0.0437053	-0.0908448	0.0980702	0.487091	0.0321106	0.692877	0.606911	0.0768639	-0.421203	-0.262767	0.0770714	-0.0294827	0.0251803	0.178709	0.387689	2.27944	2.16666	0.441498	2.02964	1.94452	1.25956	1.71843	-0.0378452	-0.0982935	0.33156	0.395009	1.63159	0.394825	0.187031	0.501918	0.600842	0.500919	0.382366	0.628437	0.418346
SigH	II07	-0.487088	-0.860848	-0.871519	0.0882899	-0.735881	-0.976637	-0.901388	-0.736093	-1.1216	-0.486409	-1.22158	-1.25525	0.279688	-1.26434	-1.28289	-1.23853	-0.107264	-1.22917	2.78215	1.66392	2.16819	0.868331	-0.189777	1.64117	1.96223	1.14289	1.4769	-0.265542	-0.875928	-0.873709	0.326072	-0.600682	-0.990621	-0.901199	-0.684956	-1.04477	0.339605	-1.21736	-1.18744	0.435631	-1.19248	-1.22066	-1.18309	-0.0131506	-1.14273	1.84659	0.364064	0.845495
[truncated: 6 more columns]
